# Supplementary material for: Optimal outpatient training for resident physicians’ general medicine in-training examination score: a cross-sectional study
Source: PubMed Central journal article supplement (PMC11724509; doi:10.1186/s12909-025-06670-5), 2025-01-11
Supplement: 12909_2025_6670_MOESM1_ESM.pdf [file 12909_2025_6670_MOESM1_ESM.pdf]

## Supplemental Digital Appendix 1: Outpatient training style of resident physician

| Parallel Style |    |            |           |            |            |            |          |    |            |            |            |            |            |
|----------------|----|------------|-----------|------------|------------|------------|----------|----|------------|------------|------------|------------|------------|
| January        |    | Monday     | Tuesday   | Wednesday  | Thursday   | Friday     | February |    | Monday     | Tuesday    | Wednesday  | Thursday   | Friday     |
| 1 Week         | AM | Inpatient  | Inpatient | Outpatient | Inpatient  | Inpatient  | 1 Week   | AM | Inpatient  | Inpatient  | Outpatient | Inpatient  | Inpatient  |
|                | PM | Outpatient | Inpatient | Inpatient  | Inpatient  | Inpatient  |          | PM | Outpatient | Inpatient  | Inpatient  | Inpatient  | Inpatient  |
| 2 Week         | AM | Inpatient  | Inpatient | Inpatient  | Inpatient  | Inpatient  | 2 Week   | AM | Inpatient  | Inpatient  | Inpatient  | Inpatient  | Inpatient  |
|                | PM | Outpatient | Inpatient | Outpatient | Inpatient  | Outpatient |          | PM | Outpatient | Inpatient  | Outpatient | Inpatient  | Outpatient |
| 3 Week         | AM | Inpatient  | Inpatient | Outpatient | Inpatient  | Inpatient  | 3 Week   | AM | Inpatient  | Inpatient  | Outpatient | Inpatient  | Inpatient  |
|                | PM | Outpatient | Inpatient | Inpatient  | Outpatient | Outpatient |          | PM | Outpatient | Inpatient  | Inpatient  | Outpatient | Outpatient |
| 4 Week         | AM | Inpatient  | Inpatient | Outpatient | Inpatient  | Inpatient  | 4 Week   | AM | Inpatient  | Inpatient  | Outpatient | Inpatient  | Inpatient  |
|                | PM | Outpatient | Inpatient | Inpatient  | Inpatient  | Outpatient |          | PM | Outpatient | Inpatient  | Inpatient  | Inpatient  | Outpatient |
| Block style    |    |            |           |            |            |            |          |    |            |            |            |            |            |
| January        |    | Monday     | Tuesday   | Wednesday  | Thursday   | Friday     | February |    | Monday     | Tuesday    | Wednesday  | Thursday   | Friday     |
| 1 Week         | AM | Inpatient  | Inpatient | Inpatient  | Inpatient  | Inpatient  | 1 Week   | AM | Outpatient | Outpatient | Outpatient | Outpatient | Outpatient |
|                | PM | Inpatient  | Inpatient | Inpatient  | Inpatient  | Inpatient  |          | PM | Outpatient | Outpatient | Outpatient | Outpatient | Outpatient |
| 2 Week         | AM | Inpatient  | Inpatient | Inpatient  | Inpatient  | Inpatient  | 2 Week   | AM | Outpatient | Outpatient | Outpatient | Outpatient | Outpatient |
|                | PM | Inpatient  | Inpatient | Inpatient  | Inpatient  | Inpatient  |          | PM | Outpatient | Outpatient | Outpatient | Outpatient | Outpatient |
| 3 Week         | AM | Inpatient  | Inpatient | Inpatient  | Inpatient  | Inpatient  | 3 Week   | AM | Outpatient | Outpatient | Outpatient | Outpatient | Outpatient |
|                | PM | Inpatient  | Inpatient | Inpatient  | Inpatient  | Inpatient  |          | PM | Outpatient | Outpatient | Outpatient | Outpatient | Outpatient |
| 4 Week         | AM | Inpatient  | Inpatient | Inpatient  | Inpatient  | Inpatient  | 4 Week   | AM | Outpatient | Outpatient | Outpatient | Outpatient | Outpatient |
|                | PM | Inpatient  | Inpatient | Inpatient  | Inpatient  | Inpatient  |          | PM | Outpatient | Outpatient | Outpatient | Outpatient | Outpatient |
| Mixed style    |    |            |           |            |            |            |          |    |            |            |            |            |            |
| January        |    | Monday     | Tuesday   | Wednesday  | Thursday   | Friday     | February |    | Monday     | Tuesday    | Wednesday  | Thursday   | Friday     |
| 1 Week         | AM | Inpatient  | Inpatient | Outpatient | Inpatient  | Inpatient  | 1 Week   | AM | Outpatient | Outpatient | Outpatient | Outpatient | Outpatient |
|                | PM | Outpatient | Inpatient | Inpatient  | Inpatient  | Inpatient  |          | PM | Outpatient | Outpatient | Outpatient | Outpatient | Outpatient |
| 2 Week         | AM | Inpatient  | Inpatient | Inpatient  | Inpatient  | Inpatient  | 2 Week   | AM | Outpatient | Outpatient | Outpatient | Outpatient | Outpatient |
|                | PM | Outpatient | Inpatient | Outpatient | Inpatient  | Outpatient |          | PM | Outpatient | Outpatient | Outpatient | Outpatient | Outpatient |
| 3 Week         | AM | Inpatient  | Inpatient | Outpatient | Inpatient  | Inpatient  | 3 Week   | AM | Outpatient | Outpatient | Outpatient | Outpatient | Outpatient |
|                | PM | Outpatient | Inpatient | Inpatient  | Outpatient | Outpatient |          | PM | Outpatient | Outpatient | Outpatient | Outpatient | Outpatient |
| 4 Week         | AM | Inpatient  | Inpatient | Outpatient | Inpatient  | Inpatient  | 4 Week   | AM | Outpatient | Outpatient | Outpatient | Outpatient | Outpatient |
|                | PM | Outpatient | Inpatient | Inpatient  | Inpatient  | Outpatient |          | PM | Outpatient | Outpatient | Outpatient | Outpatient | Outpatient |

The above is just one example.

In parallel style training, you will work in the outpatient department and on the hospital ward at the same time over the course of a month.

In block style training, you will only work in the outpatient department for a month. In the month you work on the hospital ward, you will only work on the hospital ward.

In mixed style training, there are months where you will work in the outpatient department and on the hospital ward at the same time over the course of a month, as in parallel training, and months where you will only work in the outpatient department, as in block training.
