# Supplementary material for: Optimal outpatient training for resident physicians’ general medicine in-training examination score: a cross-sectional study
Source: PubMed Central journal article supplement (PMC11724509; doi:10.1186/s12909-025-06670-5), 2025-01-11
Supplement: 12909_2025_6670_MOESM2_ESM.pdf [file 12909_2025_6670_MOESM2_ESM.pdf]

Supplemental Digital Appendix 2: Outpatient Training Compared to Community-based Hospitals and University Hospitals

Community-based hospital

Out patient training style

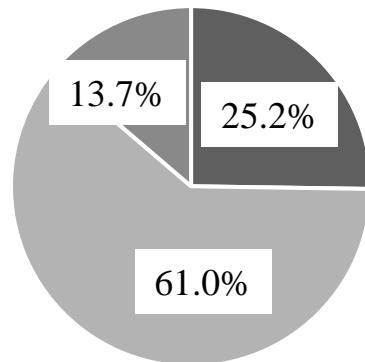

- block style
- parallel style
- mixed style

Out patient training period

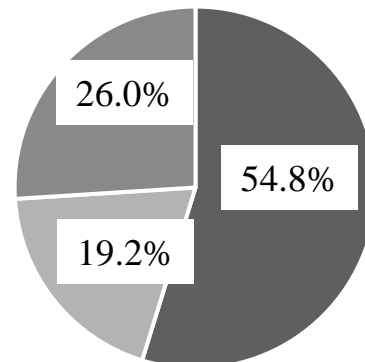

- 1 month
- 2 month
- 3 month or more

New patient per day

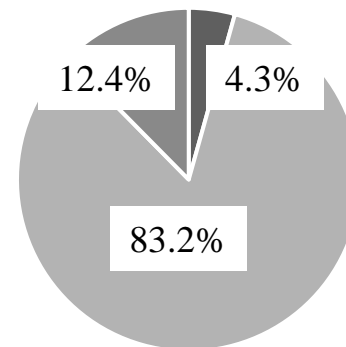

- 0 person
- 1 to 5 person
- 6 person or more

Follow-up patient per day

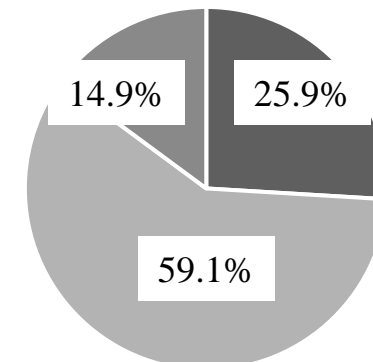

- 0 person
- 1 to 5 person
- 6 person or more

University hospital

Out patient training style

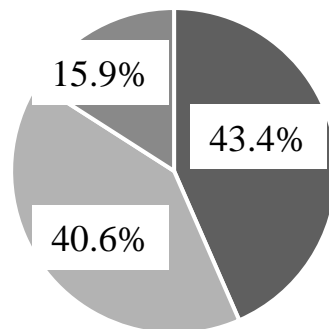

- block style
- parallel style
- mixed style

Out patient training period

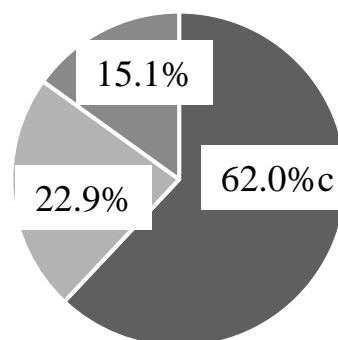

- 1 month
- 2 month
- 3 month or more

New patient per day

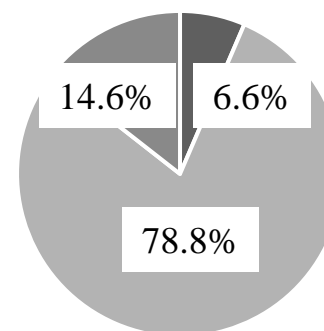

- 0 person
- 1 to 5 person
- 6 person or more

Follow-up patient per day

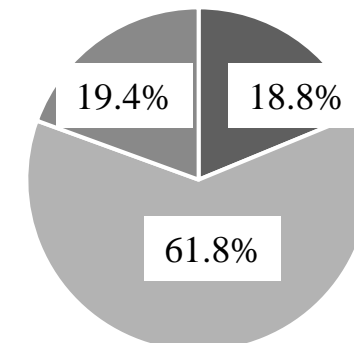

- 0 person
- 1 to 5 person
- 6 person or more
