# Supplementary material for: Optimal outpatient training for resident physicians’ general medicine in-training examination score: a cross-sectional study
Source: PubMed Central journal article supplement (PMC11724509; doi:10.1186/s12909-025-06670-5), 2025-01-11
Supplement: 12909_2025_6670_MOESM3_ESM.pdf [file 12909_2025_6670_MOESM3_ESM.pdf]

Appendix 3: Univariate/multivariate analysis with outpatient-related GM-ITE scores as the dependent variable

|                                                   | Difference | Univariable |             |                | Adjusted difference | multivariable |             |                |
|---------------------------------------------------|------------|-------------|-------------|----------------|---------------------|---------------|-------------|----------------|
|                                                   |            | 95% CI      |             | <i>p</i> Value |                     | 95% CI        |             | <i>p</i> Value |
|                                                   |            | lower limit | upper limit |                |                     | lower limit   | upper limit |                |
| <b>Sex</b>                                        |            |             |             |                |                     |               |             |                |
| Female (vs Male)                                  | 0.11       | -0.103      | 0.313       | 0.321          | 0.110               | -0.095        | 0.316       | 0.293          |
| <b>Hospital location</b>                          |            |             |             |                |                     |               |             |                |
| Rural (vs Urban)                                  | -0.14      | -0.35       | 0.06        | 0.168          | -0.21               | -0.47         | 0.06        | 0.121          |
| <b>Hospital type</b>                              |            |             |             |                |                     |               |             |                |
| Community-based hospital (vs University hospital) | 0.66       | 0.41        | 0.91        | <.0001         | 0.50                | 0.12          | 0.87        | 0.010          |
| <b>Self-study time per day</b>                    |            |             |             |                |                     |               |             |                |
| None                                              | Ref        |             |             |                | Ref                 |               |             |                |
| 0-30 minutes                                      | 0.53       | -0.18       | 1.25        | 0.145          | 0.41                | -0.29         | 1.11        | 0.250          |
| 31-60 minutes                                     | 0.84       | 0.12        | 1.56        | 0.022          | 0.62                | -0.09         | 1.32        | 0.086          |
| 61-90 minutes                                     | 0.83       | 0.08        | 1.59        | 0.030          | 0.60                | -0.14         | 1.34        | 0.110          |
| 91 minutes or more                                | 1.18       | 0.31        | 2.05        | 0.008          | 0.95                | 0.096         | 1.81        | 0.029          |
| <b>Duty hour</b>                                  |            |             |             |                |                     |               |             |                |
| 0-59hours per week                                | Ref        |             |             |                | Ref                 |               |             |                |
| 60-79 hours per week                              | 0.44       | 0.22        | 0.65        | <.0001         | 0.28                | 0.07          | 0.49        | 0.010          |
| >80 hours per week                                | 0.40       | 0.12        | 0.69        | 0.005          | 0.22                | -0.07         | 0.51        | 0.136          |

Outpatient training period

|                  |       |       |       |       |       |       |      |       |
|------------------|-------|-------|-------|-------|-------|-------|------|-------|
| 1 month          | Ref   |       |       |       | Ref   |       |      |       |
| 2 months         | -0.30 | -0.56 | -0.05 | 0.018 | -0.22 | -0.47 | 0.04 | 0.094 |
| 3 months or more | -0.17 | -0.41 | 0.06  | 0.145 | -0.21 | -0.45 | 0.03 | 0.079 |

Outpatient training style

|                |       |       |       |       |        |        |       |       |
|----------------|-------|-------|-------|-------|--------|--------|-------|-------|
| block style    | Ref   |       |       |       | Ref    |        |       |       |
| parallel style | -0.15 | -0.37 | 0.08  | 0.196 | -0.027 | -0.257 | 0.20  | 0.817 |
| mixed style    | -0.45 | -0.74 | -0.17 | 0.002 | -0.323 | -0.606 | -0.04 | 0.025 |

New outpatient per day

|                   |      |       |      |       |       |        |      |       |
|-------------------|------|-------|------|-------|-------|--------|------|-------|
| 0 persons         | Ref  |       |      |       | Ref   |        |      |       |
| 1 to 5 persons    | 0.85 | 0.40  | 1.30 | 0.000 | 0.581 | 0.109  | 1.05 | 0.016 |
| 6 persons or more | 0.28 | -0.23 | 0.80 | 0.284 | 0.136 | -0.410 | 0.68 | 0.625 |

Follow-up outpatient per day

|                   |      |       |      |       |       |        |      |       |
|-------------------|------|-------|------|-------|-------|--------|------|-------|
| 0 persons         | Ref  |       |      |       | Ref   |        |      |       |
| 1 to 5 persons    | 0.21 | -0.02 | 0.44 | 0.074 | 0.137 | -0.110 | 0.38 | 0.276 |
| 6 persons or more | 0.02 | -0.29 | 0.33 | 0.893 | 0.105 | -0.237 | 0.45 | 0.547 |

CI: confidence interval. GM-ITE: General Medicine In-Training Examination. The GM-ITE score was analysed as the objective variable.
